# Supplementary material for: Synthesis and characterization of a novel donor–acceptor–donor chiral inducer and its application in electrochemical polymerization
Source: Royal Society of Chemistry journal article supplement (doi:10.1039/c4tc02489c), 2015-01-01
Supplement: c4tc02489c1.pdf [file c4tc02489c1.pdf]

*Supplementary information for:*

Synthesis and characterization of a novel  
donor-acceptor-donor chiral inducer and application in  
electrochemical polymerization

Jiuchao Dong, Kohsuke Kawabata, and Hiromasa Goto\*

Division of Materials Science, Faculty of Pure and Applied Sciences,  
University of Tsukuba, Tsukuba, Ibaraki 305-8573, Japan

Correspondence to H. Goto, Tel: +81-298-53-5128, fax: +81-298-53-4490  
Email: [gotoh@ims.tsukuba.ac.jp](mailto:gotoh@ims.tsukuba.ac.jp)

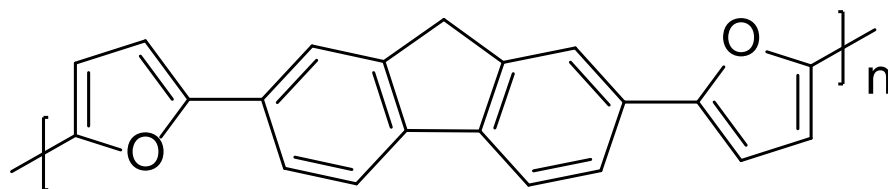

Fig. S1. Conjugated polymer P-DFF.

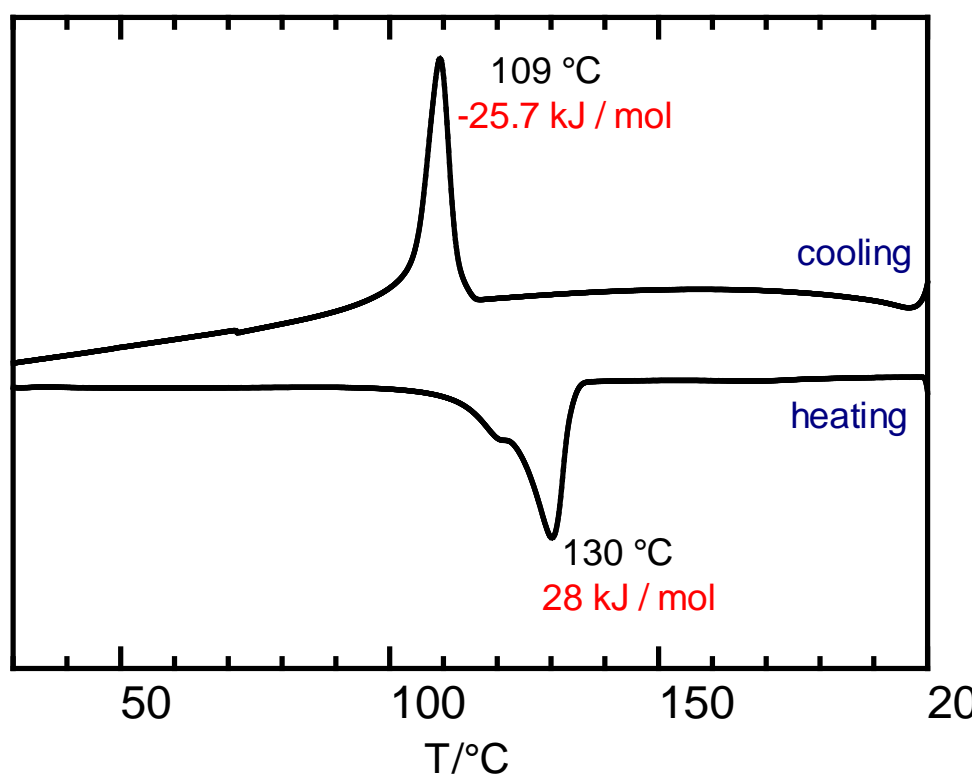

Fig. S2. DSC curves of compound (S)-D8Tt-B\* at a scan rate of 5 °C/min.

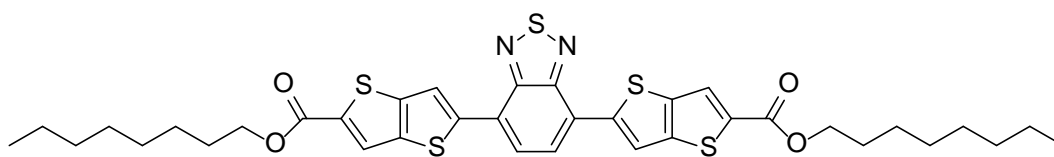

Fig. S3. Compound D8Tt-B.

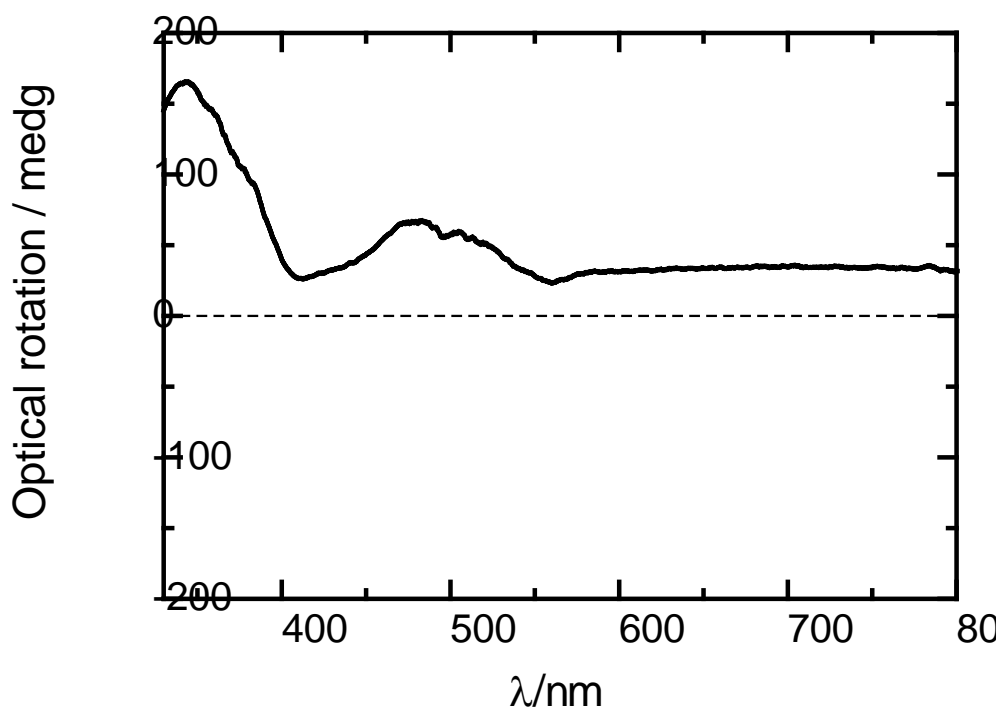

Fig. S4. ORD of compound (*S*)-D8Tt-B\* (0.025 mM in THF solution).

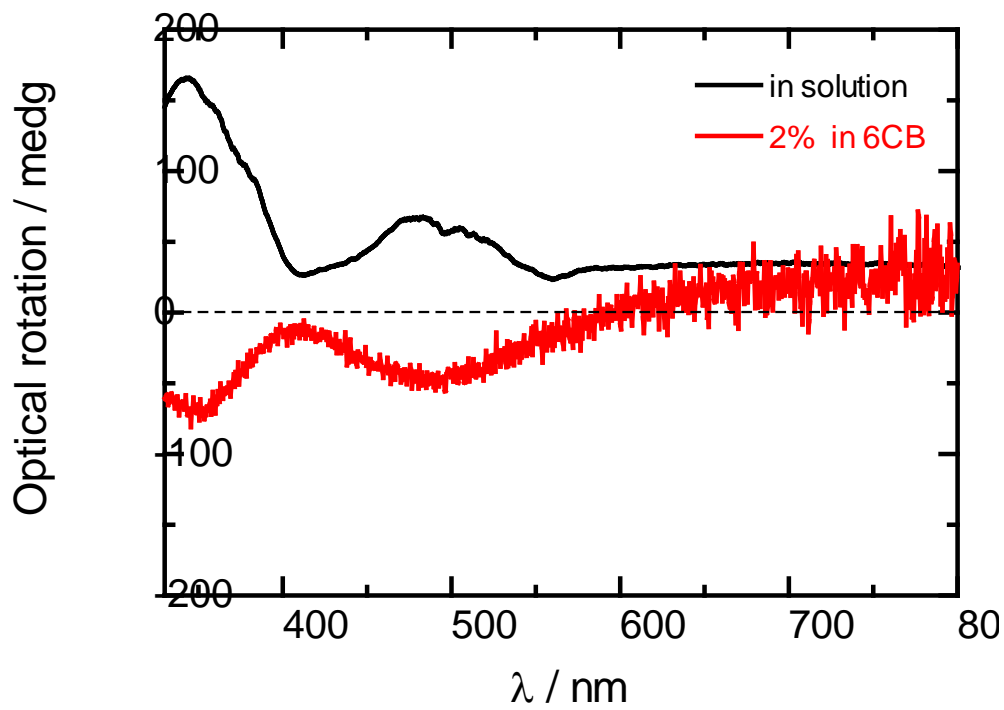

Fig. S5. ORD of compound (S)-D8Tt-B\* in THF solution and 6CB.

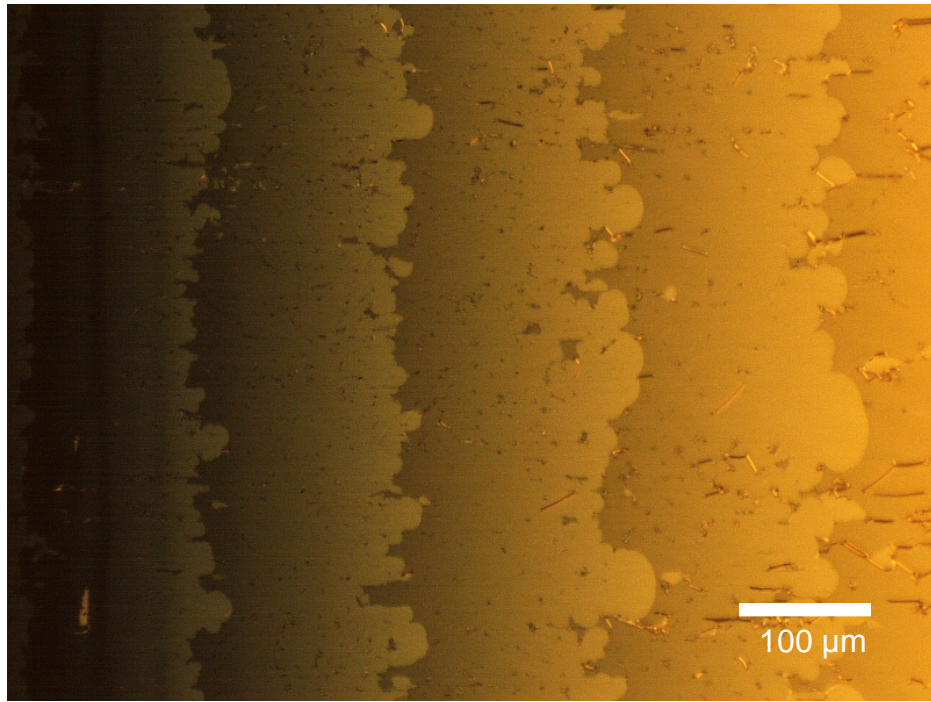

Fig. S6. POM image of the liquid crystal sample in the Grandjean-Cano cell.

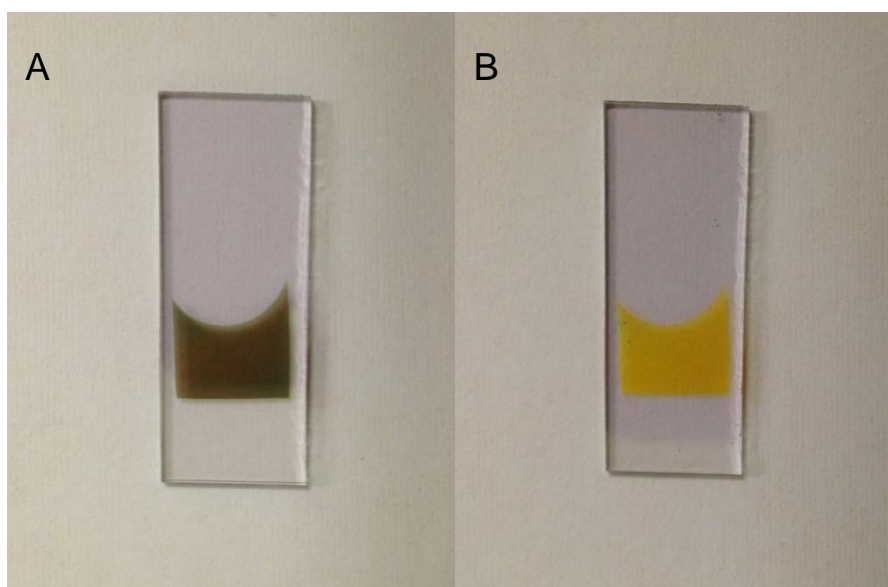

Fig. S7. Images of P-DFP films in oxidized state (A) and neutral state (B).

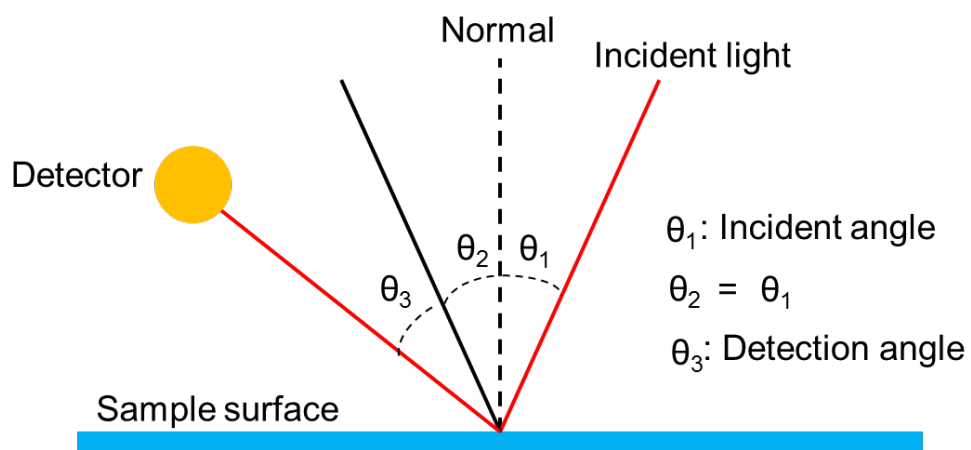

Fig. S8. Definition of incident angle and detection angle in reflection spectra.

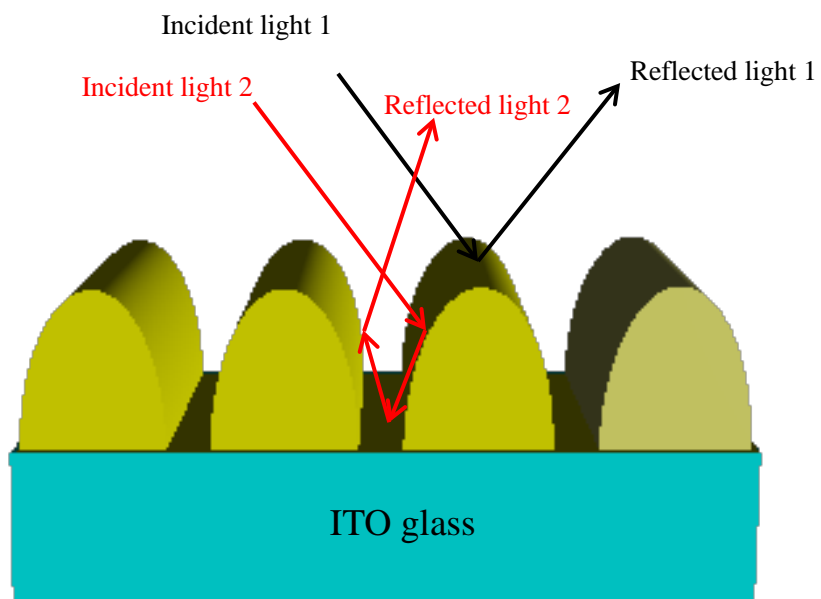

Fig. S9. Possible diagram of different reflection paths on the polymer film surface.

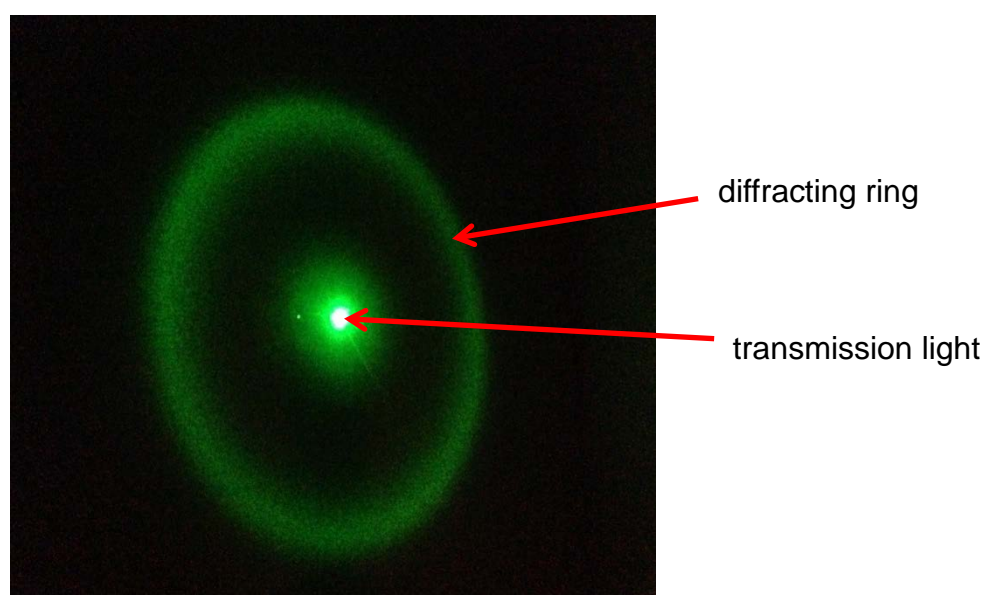

Fig. S10. Laser diffraction (532 nm).
